# Supplementary material for: Lupus spectrum ambiguity has long-term negative implications for patients
Source: PubMed Central journal article supplement — Lupus Sci Med. 2023 Jan 11;10(1):e000856. doi: 10.1136/lupus-2022-000856 (PMC9835935; doi:10.1136/lupus-2022-000856), 2023-01-11
Supplement: lupus-2022-000856supp001.pdf [file lupus-2022-000856supp001.pdf]

**Supplemental File 1****GLOBAL ADVISORY COMMITTEE**

Sang-Cheol Bae, MD, PhD, MPH | Hanyang University, South Korea

Ian Bruce, MD, FRCP | University of Manchester, U.K.

Karen Costenbader, MD, MPH | Brigham and Women's Hospital, U.S.

Brad Dickerson | Lupus and Allied Disease Association, Inc. U.S.

Thomas Dörner, MD | Charité University, Germany

Sydney Evans | Person with lupus

Ken Kalunian, MD | UC San Diego Health

Denesh Chitkara, MD | EMD Serono Research & Development Institute, Inc.

Roger Abramino Levy | GSK, U.S.

Sue Manzi, MD, MPH | Allegheny Health Network, U.S.

Eric Morand, MBBS (Hons), FRACP, PhD | Monash University, Australia

Sarah Peddicord | AstraZeneca

Sandra Raymond | Lupus Foundation of America, U.S.

Brad Rovin, MD, FACP, FASN | Ohio State University, U.S.

Tamar Rubinstein, MD, MS | Children's Hospital at Montefiore, U.S.

Laura Schanberg, MD | Duke University Medical Center, U.S.

Joan Von Feldt, MD, MEd | Professor Emeritus, University of Pennsylvania

Victoria Werth, MD | University of Pennsylvania and Philadelphia VAMC, U.S.
